# Supplementary material for: Co2P nanoparticles encapsulated in 3D porous N-doped carbon nanosheet networks as an anode for high-performance sodium-ion batteries
Source: Royal Society of Chemistry journal article supplement (doi:10.1039/c7ta09609g), 2017-12-27
Supplement: c7ta09609g1.pdf [file c7ta09609g1.pdf]

## Supporting information

### **Co<sub>2</sub>P nanoparticles encapsulated in 3D porous N-doped carbon nanosheet networks as anode for high-performance sodium-ion batteries**

Dan Zhou, Li-Zhen Fan\*

Beijing Advanced Innovation Center for Materials Genome Engineering, Institute of Advanced Materials and Technology, University of Science and Technology Beijing, Beijing 100083, China

\*Corresponding author: E-mail: fanlizhen@ustb.edu.cn (L.-Z. Fan)

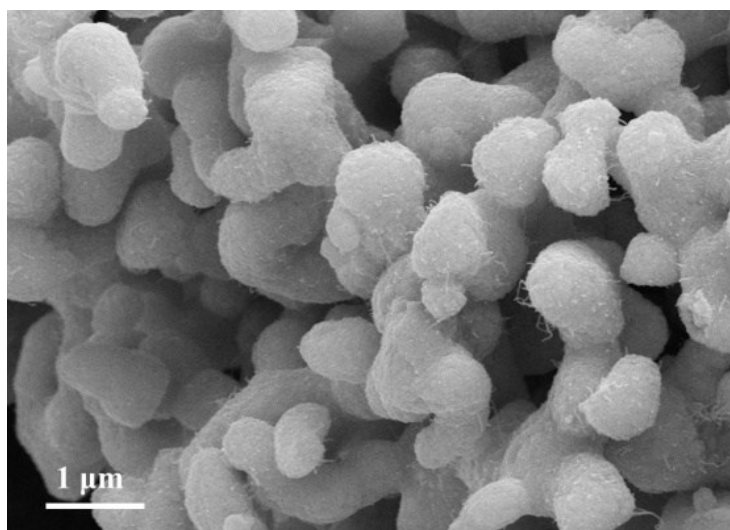

Figure S1 FE-SEM images of Co<sub>2</sub>P NPs.

Table S1 Elemental content analysis result of the Co<sub>2</sub>P-3D PNC composite

| Elements | Atomic Mass | Atomic Percentage<br>(at%) | Mass content<br>(wt%) |
|----------|-------------|----------------------------|-----------------------|
| C        | 12.011      | 63.19                      | 41.86                 |
| O        | 15.999      | 13.09                      | 11.55                 |
| N        | 14.007      | 4.75                       | 3.77                  |
| Co       | 58.933      | 6.82                       | 22.17                 |
| P        | 30.974      | 12.15                      | 20.65                 |

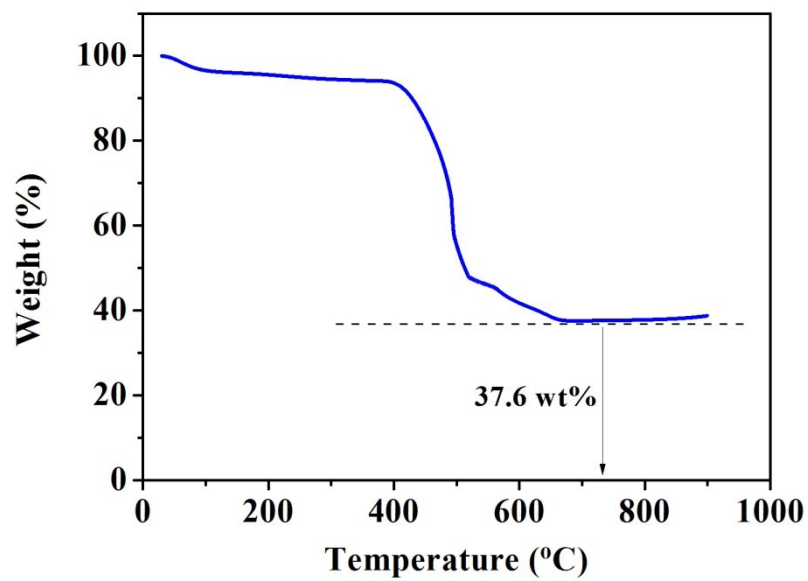

Figure S2 TGA analysis for the Co<sub>2</sub>P-3D PNC composite (about 37.6 wt% of Co<sub>2</sub>P was remained).

Table S2 Equivalent circuit parameters collected from fitting the impedance spectra of the Co<sub>2</sub>P-3D

PNC electrode.

| Status         | R <sub>e</sub> (Ω) | R <sub>f</sub> (Ω) | R <sub>ct</sub> (Ω) | Z <sub>w</sub> (Ωs <sup>-1/2</sup> ) | CPE1 (F) | CPE2 (F) |
|----------------|--------------------|--------------------|---------------------|--------------------------------------|----------|----------|
| Before cycling | 6.175              | 40.26              | 204.7               | 0.0009                               | 2.66E-6  | 3.88E-7  |
| 100 cycles     | 7.482              | 60.65              | 149.6               | 0.0021                               | 2.09E-6  | 5.11E-7  |
